# Supplementary material
Source: PubMed Central journal article supplement (PMC8213962)
Supplement: mmc1.pdf [file mmc1.pdf]

## C-reactive Protein and Risk of OSA in Four US Cohorts

*Tianyi Huang, ScD; Matthew Goodman, PhD; Xiaoyu Li, ScD; Scott A. Sands, PhD; Jun Li, PhD; Meir J. Stampfer, MD; Richa Saxena, PhD; Shelley S. Tworoger, PhD; and Susan Redline, MD*

CHEST 2021; 159(6):2439-2448

*Online supplements are not copyedited prior to posting and the author(s) take full responsibility for the accuracy of all data.*

© 2021 AMERICAN COLLEGE OF CHEST PHYSICIANS. Reproduction of this article is prohibited without written permission from the American College of Chest Physicians. See online for more details. DOI: 10.1016/j.chest.2021.01.060

**e-Table 1.** Circulating levels of C-reactive protein at baseline and risk of developing moderate-to-severe OSA (AHI $\geq$ 15) in MESA<sup>1</sup>

|                      | Quintiles of CRP |                   |                   |                   |                   | Per doubling of CRP | P-trend |
|----------------------|------------------|-------------------|-------------------|-------------------|-------------------|---------------------|---------|
|                      | Q1               | Q2                | Q3                | Q4                | Q5                |                     |         |
| MESA                 |                  |                   |                   |                   |                   |                     |         |
| Median (mg/L)        | 0.43             | 0.96              | 1.79              | 3.50              | 7.96              |                     |         |
| Cases/N              | 104/382          | 142/387           | 110/382           | 130/386           | 125/382           |                     |         |
| Model 1 <sup>2</sup> | 1.00 (ref)       | 1.52 (1.10, 2.09) | 1.07 (0.76, 1.49) | 1.56 (1.12, 2.19) | 1.87 (1.32, 2.65) | 1.12 (1.05, 1.20)   | 0.001   |
| Model 2 <sup>3</sup> | 1.00 (ref)       | 1.30 (0.94, 1.81) | 0.84 (0.59, 1.18) | 1.05 (0.74, 1.50) | 1.02 (0.69, 1.49) | 0.98 (0.91, 1.06)   | 0.61    |

<sup>1</sup>The follow-up period was 2000-2012 for MESA

<sup>2</sup>Model 1: Adjusted for age, race/ethnicity, sex, menopausal status in women, smoking, sleep duration, diet quality, physical activity, diabetes and hypertension.

<sup>3</sup>Model 2: Model 1 + continuous BMI

**e-Table 2.** Associations of baseline CRP (per doubling) with OSA severity measured by AHI in MESA

|       | Cases | Model 1 <sup>1</sup> | Model 2 <sup>2</sup> |
|-------|-------|----------------------|----------------------|
|       |       | OR (95% CI)          |                      |
| AHI   |       |                      |                      |
| <5    | 688   | Reference            | Reference            |
| 5-14  | 620   | 1.21 (1.13, 1.31)    | 1.10 (1.01, 1.19)    |
| 15-29 | 347   | 1.20 (1.10, 1.32)    | 1.03 (0.93, 1.14)    |
| ≥30   | 264   | 1.28 (1.16, 1.42)    | 1.02 (0.91, 1.15)    |

<sup>1</sup>Model 1: Adjusted for cohort, age, race/ethnicity, sex, menopausal status in women, smoking, sleep duration, diet quality, physical activity, diabetes and hypertension.

<sup>2</sup>Model 2: Model 1 + continuous BMI

**e-Table 3.** Circulating levels of C-reactive protein at baseline and risk of developing OSA, excluding participants with high C-reactive protein levels >10 mg/L<sup>1</sup>

|                      | Quintiles of CRP |                   |                   |                   |                   | Per doubling of CRP | P-trend |
|----------------------|------------------|-------------------|-------------------|-------------------|-------------------|---------------------|---------|
|                      | Q1               | Q2                | Q3                | Q4                | Q5                |                     |         |
| <b>NHS</b>           |                  |                   |                   |                   |                   |                     |         |
| (N=1,722)            |                  |                   |                   |                   |                   |                     |         |
| Median (mg/L)        | 0.59             | 1.39              | 2.33              | 4.02              | 6.74              |                     |         |
| Cases/N              | 8/344            | 11/345            | 12/344            | 16/345            | 17/344            |                     |         |
| Model 1 <sup>2</sup> | 1.00 (ref)       | 1.41 (0.55, 3.60) | 1.49 (0.59, 3.72) | 1.92 (0.80, 4.60) | 2.10 (0.88, 5.04) | 1.21 (0.99, 1.49)   | 0.06    |
| Model 2 <sup>3</sup> | 1.00 (ref)       | 1.13 (0.44, 2.91) | 1.06 (0.42, 2.72) | 1.09 (0.44, 2.73) | 1.12 (0.45, 2.82) | 1.02 (0.82, 1.26)   | 0.86    |
| <b>NHSII</b>         |                  |                   |                   |                   |                   |                     |         |
| (N=3,835)            |                  |                   |                   |                   |                   |                     |         |
| Median (mg/L)        | 0.37             | 0.61              | 0.97              | 1.62              | 3.17              |                     |         |
| Cases/N              | 19/768           | 19/766            | 44/768            | 81/766            | 105/767           |                     |         |
| Model 1 <sup>2</sup> | 1.00 (ref)       | 0.97 (0.51, 1.86) | 2.26 (1.30, 3.93) | 4.24 (2.53, 7.11) | 5.31 (3.17, 8.90) | 1.76 (1.57, 1.97)   | <.0001  |
| Model 2 <sup>3</sup> | 1.00 (ref)       | 0.85 (0.44, 1.62) | 1.70 (0.97, 2.98) | 2.53 (1.48, 4.32) | 2.13 (1.21, 3.74) | 1.33 (1.16, 1.52)   | <.0001  |
| <b>HPFS</b>          |                  |                   |                   |                   |                   |                     |         |
| (N=3,024)            |                  |                   |                   |                   |                   |                     |         |
| Median (mg/L)        | 0.26             | 0.55              | 0.92              | 1.60              | 3.46              |                     |         |
| Cases/N              | 63/604           | 68/606            | 73/604            | 88/605            | 98/605            |                     |         |
| Model 1 <sup>2</sup> | 1.00 (ref)       | 1.04 (0.72, 1.51) | 1.14 (0.79, 1.65) | 1.46 (1.02, 2.09) | 1.55 (1.09, 2.22) | 1.14 (1.05, 1.23)   | 0.001   |
| Model 2 <sup>3</sup> | 1.00 (ref)       | 0.93 (0.64, 1.36) | 0.97 (0.67, 1.41) | 1.15 (0.80, 1.66) | 1.11 (0.76, 1.62) | 1.06 (0.97, 1.15)   | 0.21    |



MESA  
(N=1,786)

|                      |            |                   |                   |                   |                   |                   |       |
|----------------------|------------|-------------------|-------------------|-------------------|-------------------|-------------------|-------|
| Median (mg/L)        | 0.41       | 0.91              | 1.60              | 2.99              | 5.82              |                   |       |
| Cases/N              | 39/362     | 49/351            | 58/359            | 47/357            | 54/357            |                   |       |
| Model 1 <sup>2</sup> | 1.00 (ref) | 1.28 (0.81, 2.04) | 1.55 (0.99, 2.45) | 1.29 (0.80, 2.09) | 1.95 (1.20, 3.16) | 1.16 (1.04, 1.30) | 0.007 |
| Model 2 <sup>3</sup> | 1.00 (ref) | 1.05 (0.66, 1.70) | 1.22 (0.77, 1.95) | 0.83 (0.50, 1.37) | 1.02 (0.61, 1.73) | 0.99 (0.88, 1.12) | 0.87  |

Pooled analysis (N=10,367)

|                      |            |                   |                   |                   |                   |                   |        |
|----------------------|------------|-------------------|-------------------|-------------------|-------------------|-------------------|--------|
| Median (mg/L)        | 0.35       | 0.70              | 1.23              | 2.31              | 5.52              |                   |        |
| Cases/N              | 131/2,073  | 153/2,073         | 202/2,074         | 238/2,074         | 245/2,073         |                   |        |
| Model 1 <sup>2</sup> | 1.00 (ref) | 1.24 (0.97, 1.58) | 1.66 (1.32, 2.11) | 2.14 (1.70, 2.70) | 2.46 (1.94, 3.12) | 1.27 (1.20, 1.34) | <.0001 |
| Model 2 <sup>3</sup> | 1.00 (ref) | 1.10 (0.86, 1.42) | 1.28 (1.00, 1.63) | 1.44 (1.13, 1.83) | 1.29 (1.00, 1.67) | 1.07 (1.01, 1.14) | 0.02   |

<sup>1</sup>The follow-up period was 2002-2012 for NHS, 1995-2013 for NHSII, 1996-2012 for HPFS and 2000-2012 for MESA

<sup>2</sup>Model 1: Adjusted for cohort (pooled analysis), age, race/ethnicity, sex (MESA and pooled analysis), menopausal status in women, smoking, sleep duration, diet quality, physical activity, diabetes and hypertension.

<sup>3</sup>Model 2: Model 1 + continuous BMI

**e-Table 4.** Subgroup associations between C-reactive protein (per doubling) and OSA risk by age, sex, menopausal status and BMI in individual cohorts

|                          | NHS               | NHSII             | HPFS              | MESA              | P-heterogeneity by cohort |
|--------------------------|-------------------|-------------------|-------------------|-------------------|---------------------------|
|                          | OR (95% CI)       |                   |                   |                   |                           |
| <b>Age</b>               |                   |                   |                   |                   |                           |
| <55 years                | --                | 1.32 (1.17, 1.50) | 1.05 (0.92, 1.21) | 0.97 (0.80, 1.17) | 0.008                     |
| ≥55 years                | 1.00 (0.84, 1.18) | --                | 1.05 (0.95, 1.15) | 0.99 (0.88, 1.12) | 0.77                      |
| <b>Sex</b>               |                   |                   |                   |                   |                           |
| Men                      | --                | --                | 1.05 (0.98, 1.14) | 0.96 (0.81, 1.13) | 0.43                      |
| Women                    | 1.00 (0.84, 1.18) | 1.32 (1.17, 1.50) | --                | 0.99 (0.87, 1.13) | 0.003                     |
| <b>Menopausal status</b> |                   |                   |                   |                   |                           |
| Premenopausal            | --                | 1.32 (1.16, 1.50) | --                | 1.16 (0.76, 1.77) | 0.57                      |
| Postmenopausal           | 1.00 (0.84, 1.18) | 1.14 (0.65, 2.02) | --                | 0.96 (0.78, 1.16) | 0.83                      |
| <b>BMI</b>               |                   |                   |                   |                   |                           |
| <25 kg/m <sup>2</sup>    | 1.28 (0.43, 3.84) | 1.26 (0.92, 1.73) | 1.20 (1.05, 1.38) | 1.15 (0.91, 1.46) | 0.97                      |
| ≥25 kg/m <sup>2</sup>    | 0.90 (0.71, 1.15) | 1.10 (0.95, 1.28) | 1.00 (0.91, 1.10) | 0.94 (0.84, 1.05) | 0.32                      |

Adjusted for age, race/ethnicity, sex (MESA only), menopausal status in women, smoking, sleep duration, recent physical exams (NHS/NHSII and HPFS), diet quality, physical activity, diabetes, hypertension and BMI.
